# Supplementary material for: Ultrasensitive and stable determination of lead ions by a glassy carbon electrode modified with a phenanthroline-based electropolymerized film
Source: Royal Society of Chemistry journal article supplement (doi:10.1039/c4ra10906f), 2014-11-12
Supplement: c4ra10906f1.pdf [file c4ra10906f1.pdf]

## Supporting Information for

# Ultrasensitive and Stable Determination of Lead Ion by Phenanthroline-based Electropolymerized Film Modified Glassy Carbon Electrode

C.Y. Ji,<sup>a</sup> P. Li,<sup>a</sup> H.W. Ma,<sup>a</sup> G.C. Yang,<sup>b</sup> and M. Zhang,<sup>a,\*</sup>

<sup>a</sup> State Key Laboratory of Supramolecular Structure and Materials,  
Jilin University, Changchun 130012, P. R. China

<sup>b</sup> School of Chemistry and Life Science,

Changchun University of Technology, Changchun 130012, P. R. China

†Tel: +86-431-85167507, fax: +86-431-85193421. E-mail address:  
zhming@jlu.edu.cn.

The synthesis route and structure of TCFC is as follows.

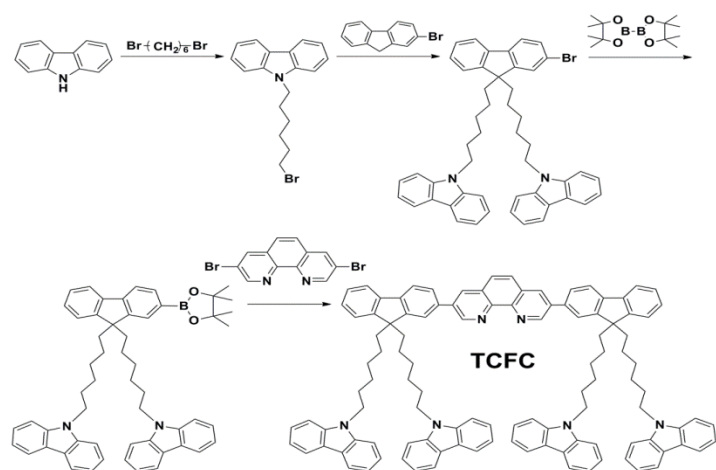

Figure S1. The synthesis route and structure of TCFC.

To a mixture of 3,8-dibromo-1,10-phenanthroline (0.03 g, mmol), and 2-(4,4,1,5,5-tetramethyl-1,3,2-dioxaborolan)-9,9-(N-carbazole-hexyl)fluorene (150 mg, mmol) in 3 mL of toluene with 2 mL of 2.0 M  $\text{Na}_2\text{CO}_3$ , 17.5 mg  $\text{Pd}(\text{PPh}_3)_4$ , was

added under nitrogen atmosphere, and the resulting mixture was stirred at 80°C for 72 h. After cooling to room temperature, the mixture was extracted with dichloromethane. The organic layer was dried over anhydrous MgSO<sub>4</sub>. The precipitated solid was filtrated and purified by chromatography using petroleum ether/dichloromethane as the eluent to afford a white solid 0.06 g (yield: 50 %). <sup>1</sup>H NMR (500 MHz, DMSO) : δ 9.55 (d, 2H), 8.84 (d, 2H), 8.11 (d, 2H), 8.06 (d, 8H), 8.02 (s, 2H), 7.97 (m, 4H), 7.86 (m, 2H), 7.45 (d, 8H), 7.34 (m, 12H), 7.27(m, 2H), 7.1(t, 8H), 4.23 (t, 8H), 2.1 (m, 8H), 1.52 (m, 8H), 1.03 (m, 16H), 0.50 (m, 8H). MALDI-TOF-MS (m/z): 1506.01 [M<sup>+</sup>] 1507.3.
